# Supplementary material for: An oligopeptide/aptamer-conjugated dendrimer-based nanocarrier for dual-targeting delivery to bone
Source: Royal Society of Chemistry journal article supplement (doi:10.1039/d0tb02926b), 2021-01-01
Supplement: d0tb02926b1.pdf [file d0tb02926b1.pdf]

## Supporting information

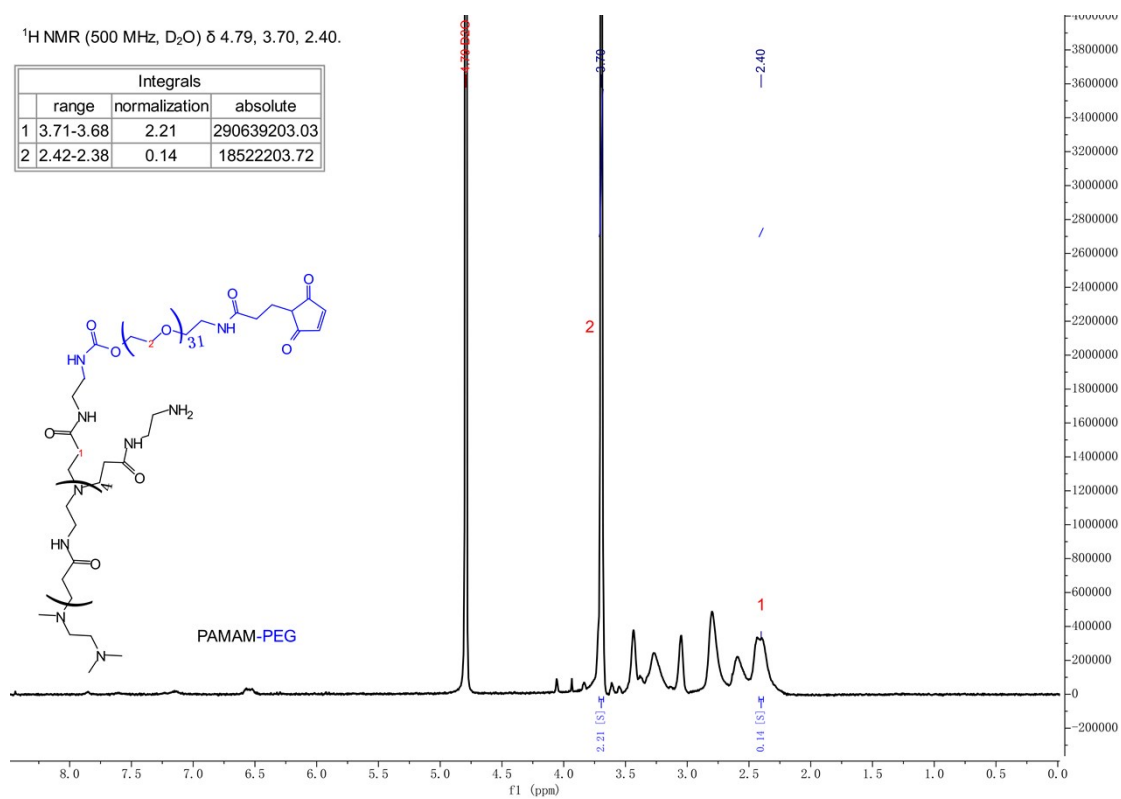

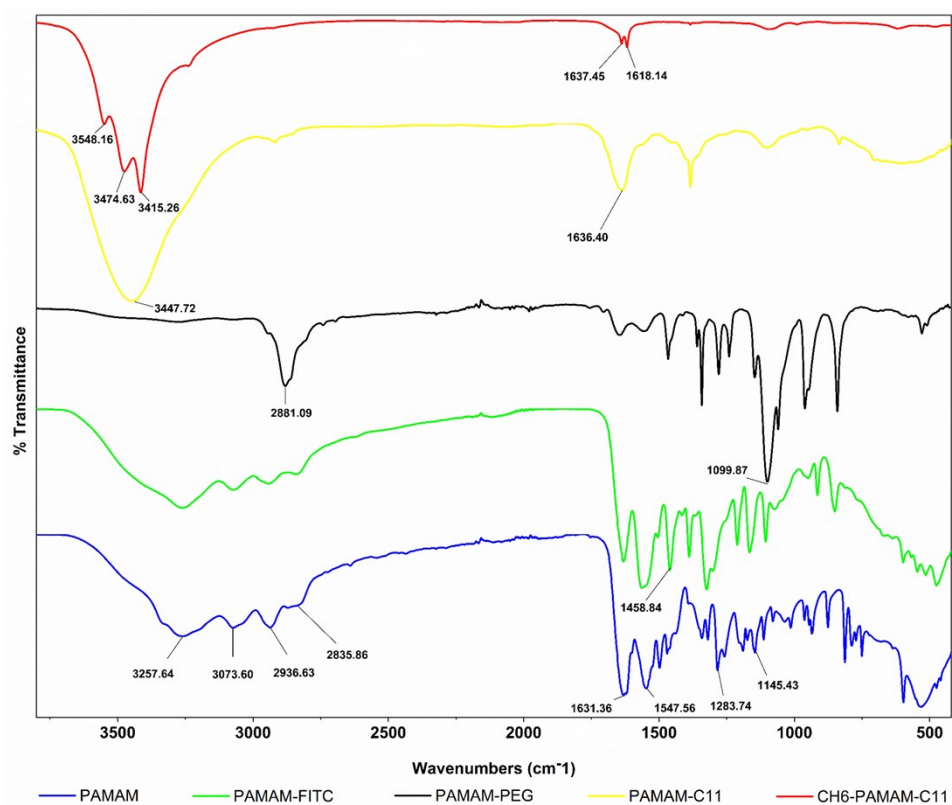

**Figure S2.** FTIR spectra of PAMAM, PAMAM-FITC, PAMAM-PEG, PAMAM-C11, and CH6-PAMAM-C11.

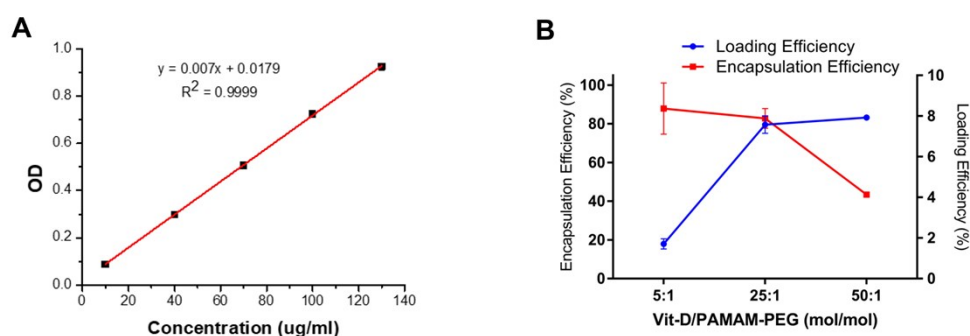

**Figure S3.** VitD loading of PAMAM-PEG. (A) Standard curve of VitD. (B) Encapsulation and loading efficiency of PAMAM-PEG for VitD at a VitD:PAMAM ratio of 5:1, 25:1, and 50:1. The results were obtained by measuring the absorbance of VitD and PAMAM-PEG in PBS solution containing 10% DMSO at 280 nm, and the data are reported as the mean  $\pm$  s.d. ( $n = 6$ ).

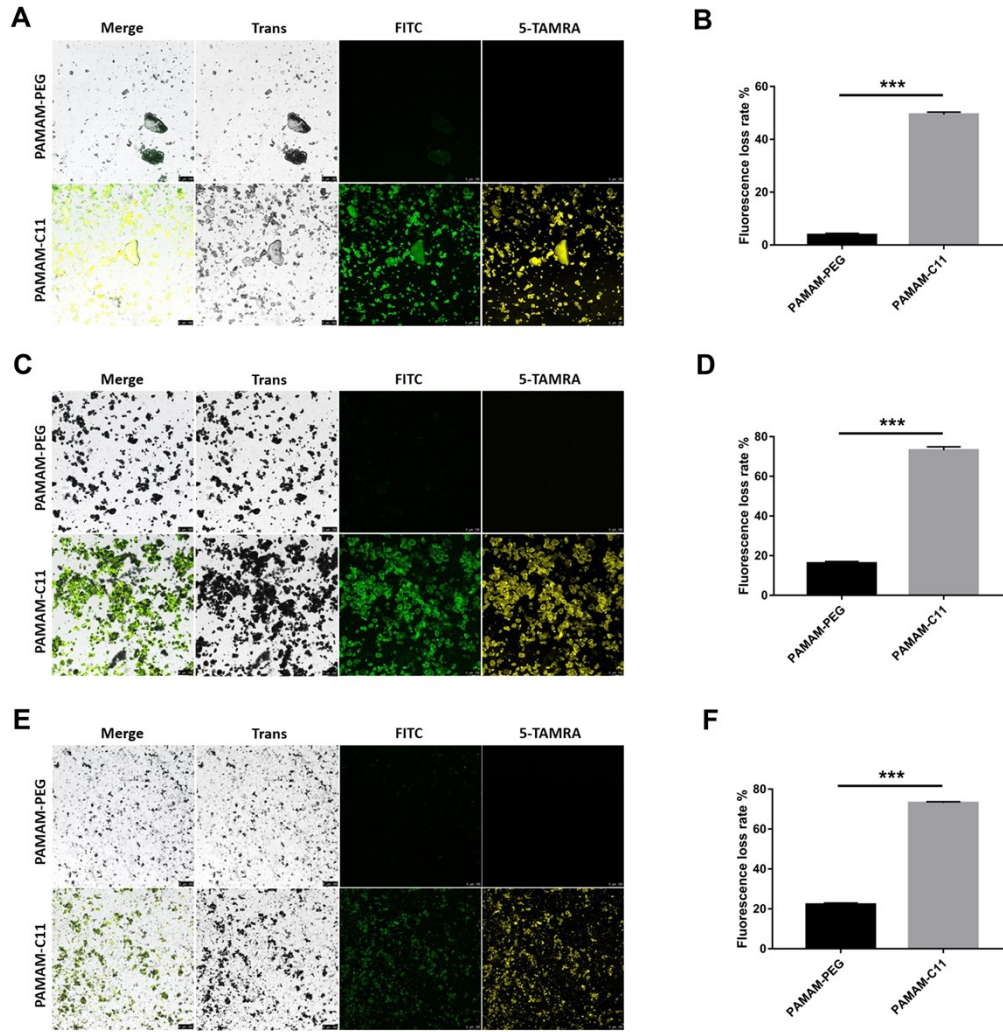

**Figure S4.** Binding to calcium-containing inorganics of PAMAM-C11. Representative confocal laser fluorescence images of HAP binding (**A**),  $\text{Ca}_3(\text{PO}_4)_2$  binding (**C**), and  $\text{CaC}_2\text{O}_4$  binding (**E**) of PAMAM-PEG and PAMAM-C11 nanocarriers. Colocalization of HAP (Trans) with FITC-labeled PAMAM dendrimer (green) and 5-TAMRA-labeled C11 peptide (yellow). HAP (50  $\mu\text{M}$ ) was stirred with 5  $\mu\text{g}/\text{ml}$  nanocarrier alone for 1 h. Scale bars, 100  $\mu\text{m}$ . Quantitative analysis of the FITC fluorescence loss rate determined by analyzing the supernatant of 5  $\mu\text{M}$  HAP (**B**),  $\text{Ca}_3(\text{PO}_4)_2$  (**D**), and  $\text{CaC}_2\text{O}_4$  (**F**) stirred with 5  $\mu\text{g}/\text{ml}$  nanocarrier alone for 1 h. \*\*\* $P < 0.001$  by t-test.  $n = 3$  per group. Data are the mean  $\pm$  s.e.

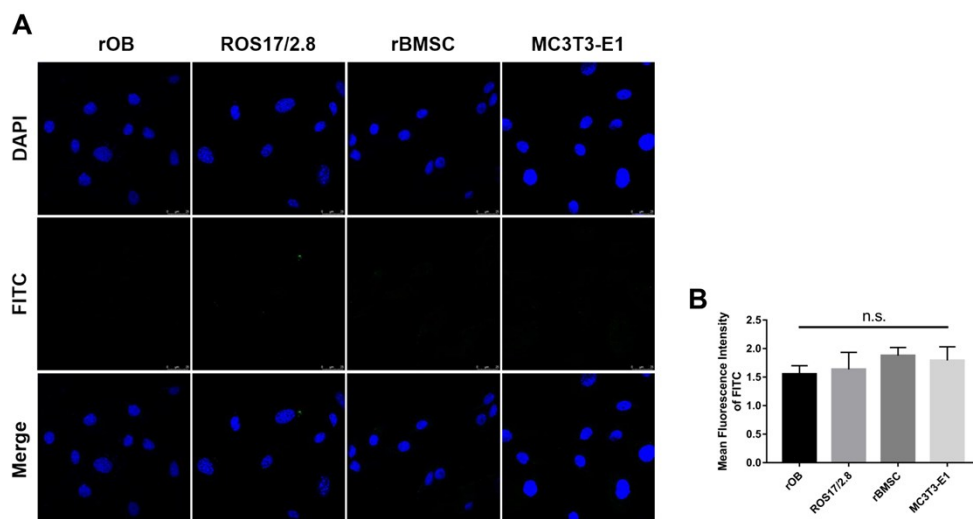

**Figure S5.** Cellular targeting of nanocarrier. (A) Representative confocal laser fluorescence images of cellular selectivity of FITC-labeled PAMAM-PEG for rat primary osteoblasts (rOBs), rat ROS 17/2.8 osteoblasts, rat bone marrow mesenchymal stem cells (rBMSCs) and mouse MC3T3-E1 preosteoblasts. Nuclei were counterstained with DAPI (blue). Scale bars, 25  $\mu$ m. (B) Quantitative analysis of the mean fluorescence intensity (FITC) of confocal images of cellular selectivity of PAMAM-PEG. No significance (n.s.) by t-test.  $n = 3$  per group. Data are the mean  $\pm$  s.e.

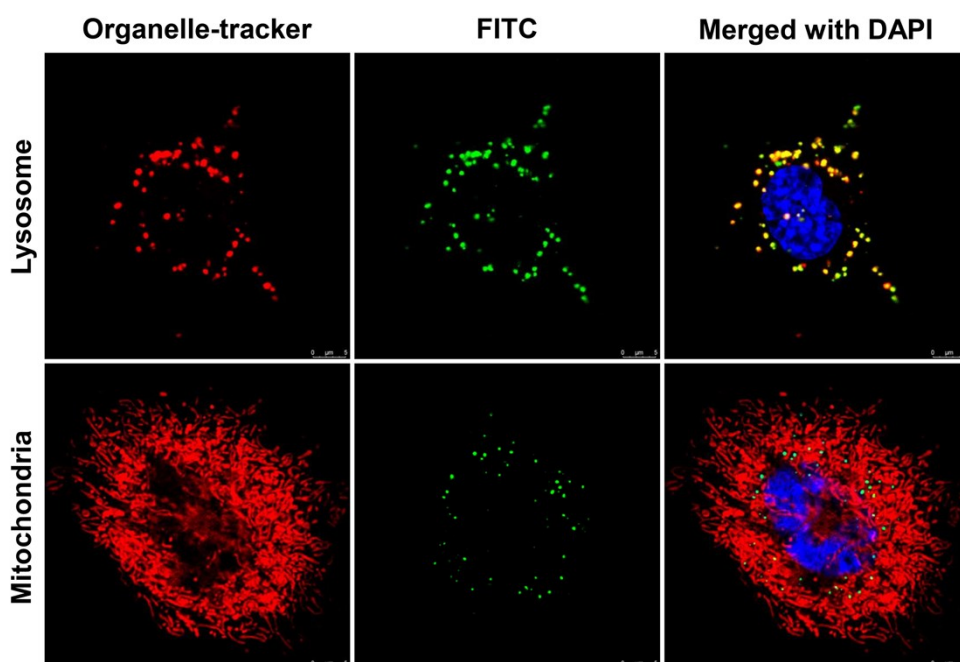

**Figure S6.** Cellular trafficking and subcellular localization of the PAMAM dendrimer. Lysosomal and mitochondrial colocalization in ROS 17/2.8 cells incubated with FITC-labeled PAMAM for 24 h. Cell nuclei were stained with DAPI. Lysosomes and mitochondria were stained by Lyso-Tracker Red and Mito-Tracker Deep Red FM, respectively. Scale bars, 5  $\mu$ m.

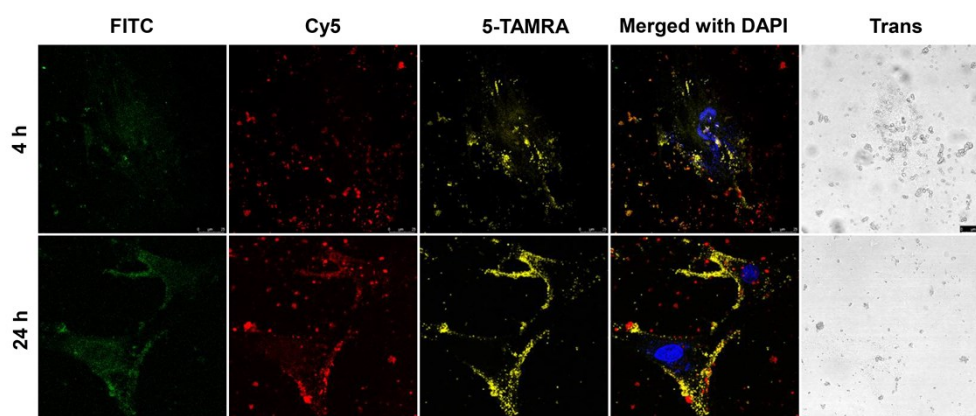

**Figure S7.** Selectivity of CH6-PAMAM-C11 nanocarriers for rOBs co-existed with HAP. Representative confocal fluorescence image of the selectivity of CH6-PAMAM-C11 for rOBs and HAP after co-culture 4 h and 24 h. rOBs were seeded on a substrate containing HAP 24 h in advance. Scale bars, 25  $\mu$ m.

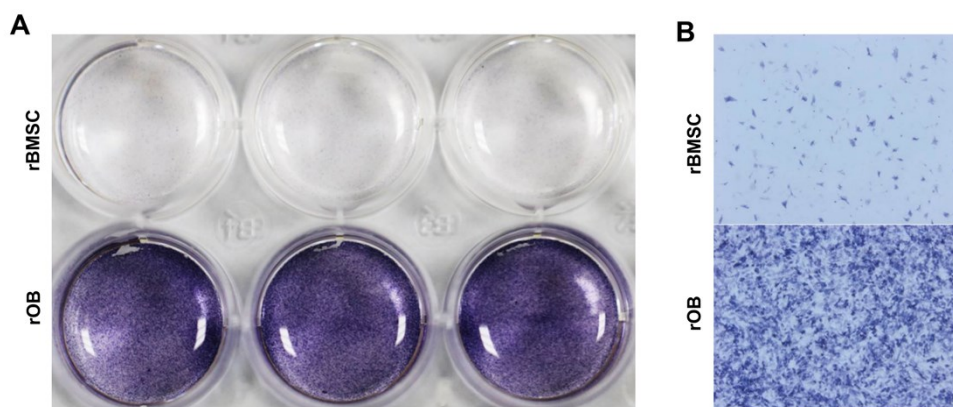

**Figure S8.** Extraction and identification of rOBs and rBMSCs. Optical (A) and microscopy images (B) of ALP staining of rOBs and rBMSCs cultured for 2 days without any inducers.

**Table S1.** The physicochemical characteristics of PAMAM, PAMAM-PEG, PAMAM-CH6, and CH6-PAMAM-C11 polyplexes. (data represent the mean  $\pm$  S.D., n=3)

| polyplexes    | Particle sizes    |                                  | Zeta potential (mV) |
|---------------|-------------------|----------------------------------|---------------------|
|               | Z-average<br>(nm) | Polydispersity index<br>(P.D.I.) |                     |
| PAMAM         | 4.00 $\pm$ 0.57   | 0.19 $\pm$ 0.11                  | 13.53 $\pm$ 2.44    |
| PAMAM-PEG     | 12.22 $\pm$ 0.82  | 0.18 $\pm$ 0.01                  | 3.94 $\pm$ 1.74     |
| PAMAM-CH6     | 20.79 $\pm$ 1.40  | 0.15 $\pm$ 0.02                  | 1.13 $\pm$ 1.40     |
| CH6-PAMAM-C11 | 40.66 $\pm$ 3.77  | 0.25 $\pm$ 0.02                  | -1.15 $\pm$ 2.26    |

**Table S2.** Sequences and modifications of CH6 aptamer and C11 peptide.

| Name | Sequences and modifications                                   | Molecular weight |
|------|---------------------------------------------------------------|------------------|
| CH6  | (5'-3') Cy5-AGTCTGTTGGACCGAATCCCGTGGACGCACCC-<br>TTTGGACG-THS | 13348            |
| C11  | (-N to -C) CSTDK(5-TAMRA)TKREEVD                              | 1823             |
